# Supplementary material
Source: publisher figshare collection journal article supplement (https://aacr.figshare.com/articles/dataset/_/23553195)
Supplement: Supplementary file 1 [file 41323704]

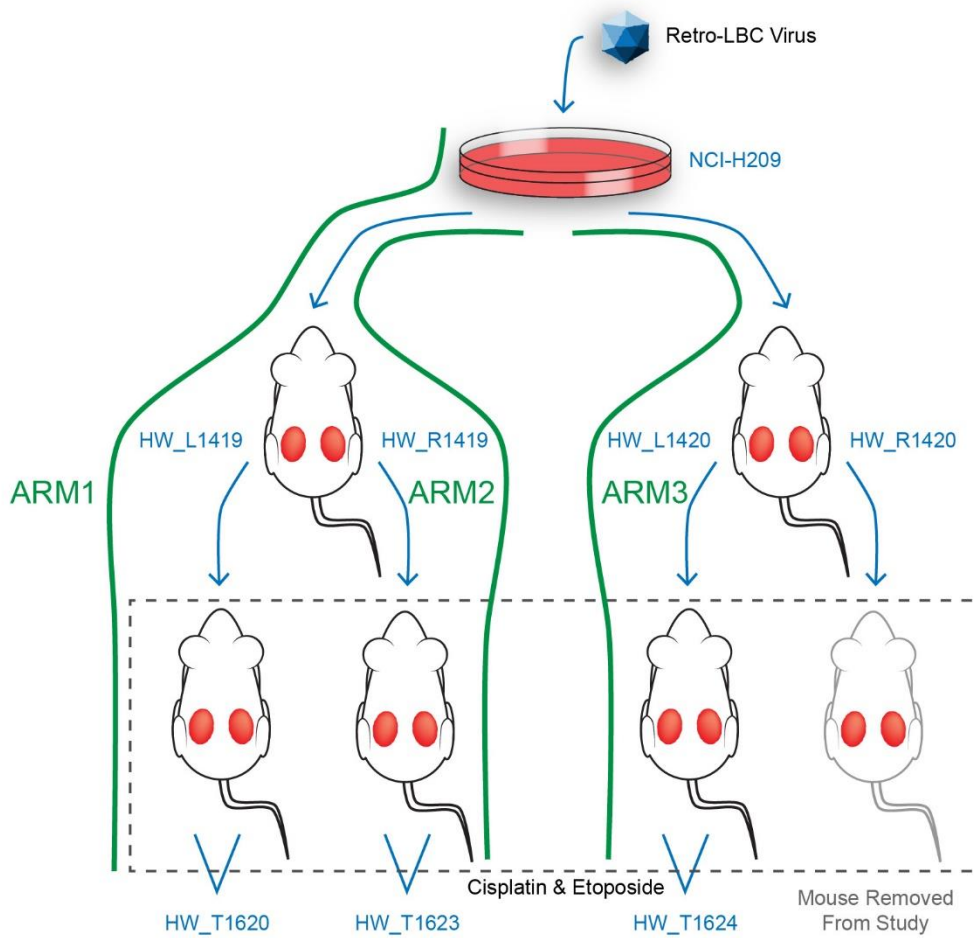

**Supplementary Figure S10 | Graphic displaying the sample makeup of the three NCI-H209 sample arms. 2<sup>o</sup> transplant of HW\_R1420 succumbed to condition unrelated to study before xenografts were palpable or chemotherapy treatment.**
